# Supplementary material for: Novel Roles of Formin mDia2 in Lamellipodia and Filopodia Formation in Motile Cells
Source: PLOS journal article supplement (doi:10.1371/journal.pbio.0050317), 2007-11-19

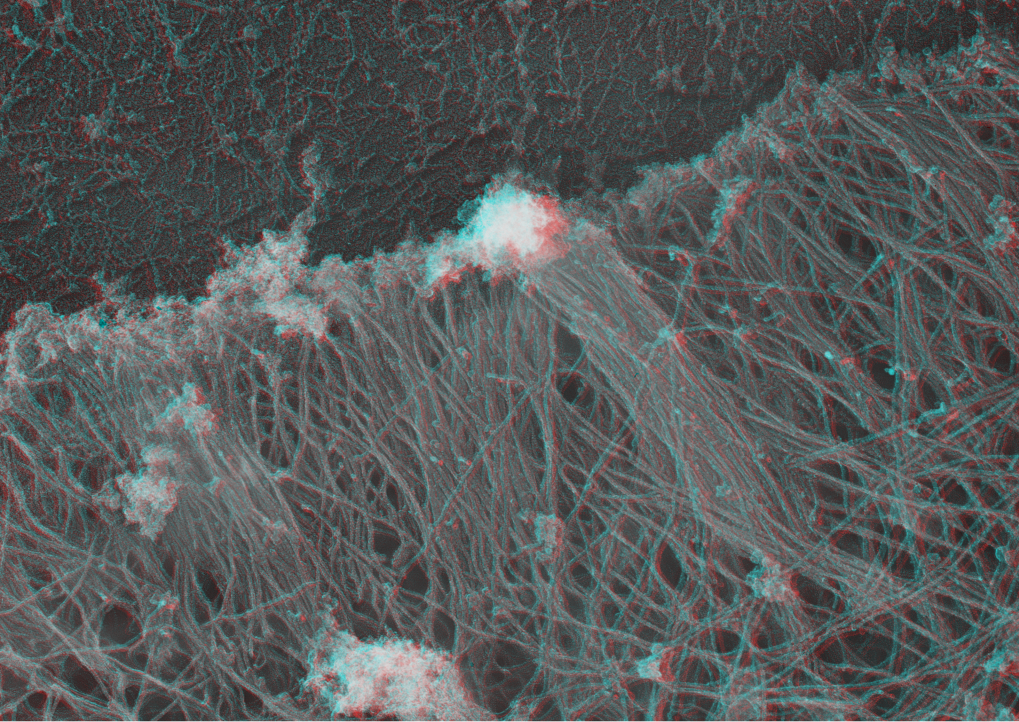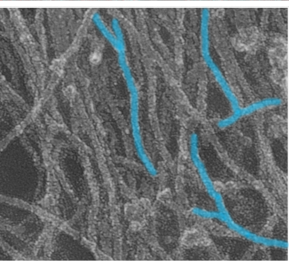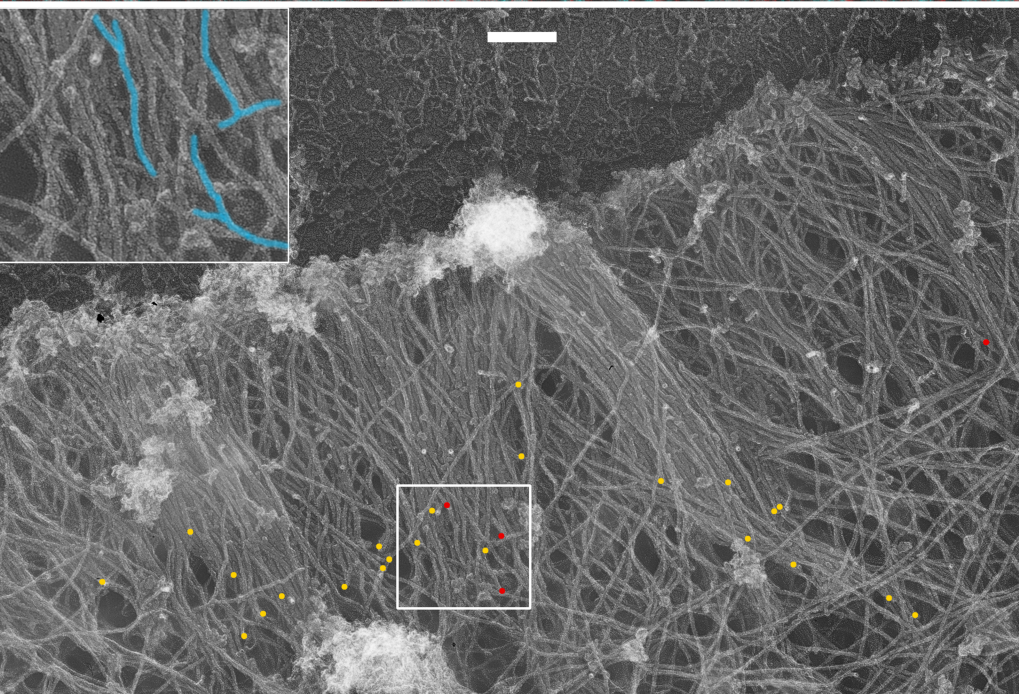

Supplement: S4 (10.1371/journal.pbio.0050317.s004) [file journal.pbio.0050317.s004]
